# Supplementary material
Source: PubMed Central journal article supplement (PMC3801068)
Supplement: 1302360110_pnas.201302360SI.pdf [file 1302360110_pnas.201302360SI.pdf]

# Supporting Information

Okazaki et al. 10.1073/pnas.1302360110

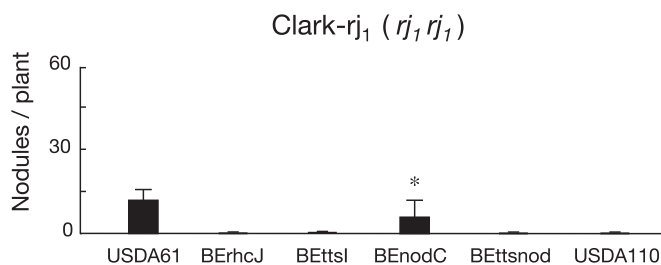

**Fig. S1.** Nodulation of *Glycine max* L. cv. Clark-rj<sub>1</sub> inoculated with wild-type and mutant strains of *Bradyrhizobium elkanii* USDA61 and *Bradyrhizobium japonicum* USDA110. Nodule numbers were counted 30 d after inoculation. Nodulation tests were performed at least three times, values shown are means obtained from at least 18 plants, and error bars indicate SDs. Statistical analyses (Student *t* test) were performed comparing mutants with the wild-type strain. \**P* < 0.05.

## Other Supporting Information Files

- [Table S1 \(DOCX\)](#)
- [Table S2 \(DOCX\)](#)
- [Table S3 \(DOCX\)](#)
- [Table S4 \(DOCX\)](#)
- [Table S5 \(DOCX\)](#)
- [Table S6 \(DOCX\)](#)
- [Dataset S1 \(XLSX\)](#)
